17. Kamiji K, Morita Y, Nagai M: Study of test procedure to evaluate airbag deployment force. Honda Res Dev Co, Ltd 98-S5-O-12:1071-1079
18. Newman RL. Scenarios for "rare event" simulation and flight testing. TR-02-07A 2002:1-39
19. Medical and Healthcare Products Regulatory Agency (MHRA): Human factors and usability engineering—Guidance for medical devices including drug-device combination products. 2016; 1-30. Available at: <https://www.gov.uk/government/news/human-factors-and-usability-engineering-guidance-for-medical-devices-including-drug-device-combination-products>. Accessed August 11, 2016
20. National Quality Board: Human factors in healthcare: A concordat from the National Quality Board. 2013. Available at: <https://www.england.nhs.uk/wp-content/uploads/2013/11/nqb-hum-fact-concord.pdf>. Accessed August 22, 2016
21. Kusminsky RE: Complications of central venous catheterization. J Am Coll Surg 2007; 204:681-96
22. The Royal College of Anaesthetists: Medical workforce census report 2015. 2016. Available at: <https://www.medicalcouncil.ie/News-and-Publications/Reports/Medical-Workforce-Intelligence-Report-2015.html>. Accessed August 11, 2016
23. Chassin MR, Loeb JM: High-reliability health care: Getting there from here. Milbank Q 2013; 91:459-90
24. Aggarwal R, Mytton OT, Derbrew M, Hananel D, Heydenburg M, Issenberg B, MacAulay C, Mancini ME, Morimoto T, Soper N, Ziv A, Reznick R: Training and simulation for patient safety. Qual Saf Health Care 2010; 19(Suppl 2):i34-43
25. Donahue AK, Tuohy RV: Lessons we don't learn: A study of the lessons of disasters, why we repeat them, and how we can learn them. Homel Secur Aff 2006; II:1-28. Available at: <https://www.hsaj.org/articles/167>. Accessed August 11, 2016
26. Reason J: Human error: Models and management. BMJ 2000; 320:768-70

## ANESTHESIOLOGY REFLECTIONS FROM THE WOOD LIBRARY-MUSEUM

### From Gridiron to Graves: Hiking from "Bulldog Stadium" to Crawford Long's Resting Place

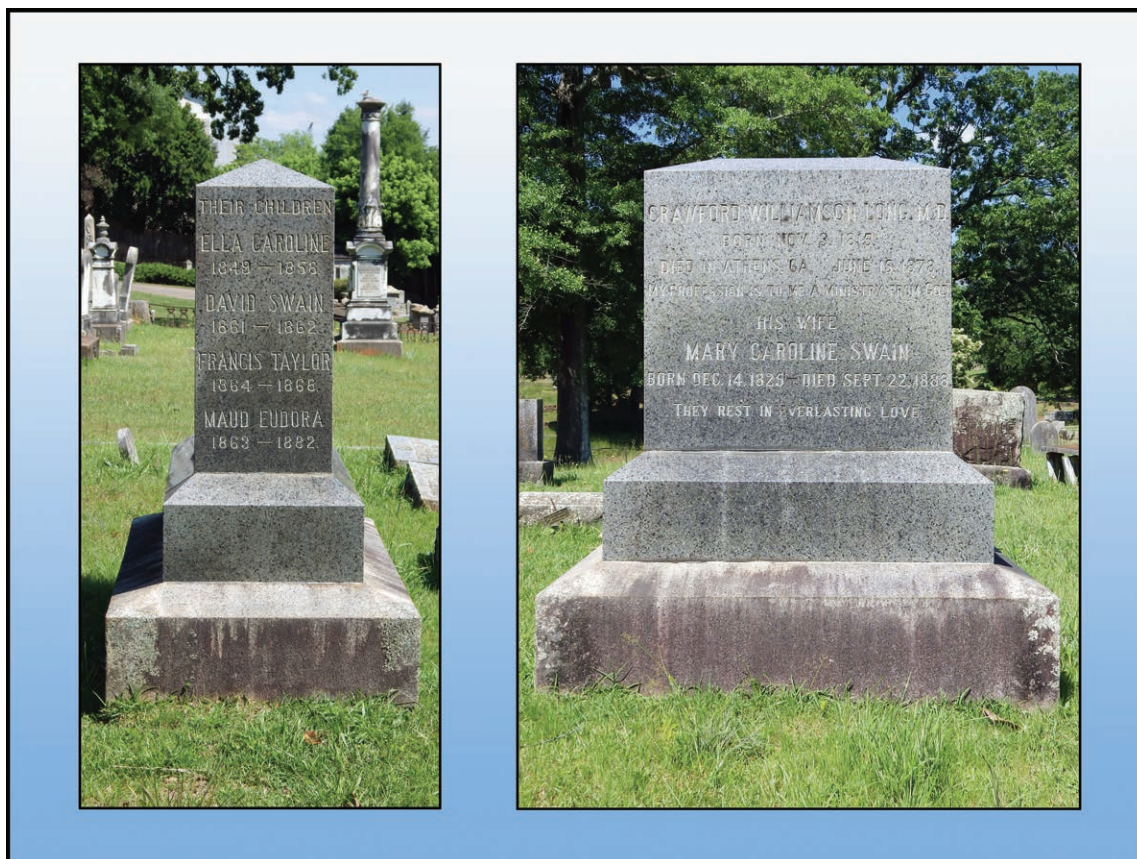

In the northeast of Georgia, the college town of Athens celebrates the football prowess of its University of Georgia's Bulldogs. After visiting Sanford Stadium, home turf of the Bulldogs, interested fans can cross East Campus Road and hike into Oconee Hill Cemetery. There they can find the grave of the physician-anesthetist and pharmacist Crawford Williamson Long, M.D. (1815 to 1878). Dr. Long etherized James Venable in 1842. One hundred years later, the University of Georgia Bulldogs won the national football championship in 1942. (Copyright © the American Society of Anesthesiologists' Wood Library-Museum of Anesthesiology.)

*George S. Bause, M.D., M.P.H., Honorary Curator and Laureate of the History of Anesthesia, Wood Library-Museum of Anesthesiology, Schaumburg, Illinois, and Clinical Associate Professor, Case Western Reserve University, Cleveland, Ohio. UJYC@aol.com.*
